# Supplementary material
Source: publisher site journal article supplement (https://www.dovepress.com/article/440598)
Supplement: Supplementary file 1 [file get_supplementary_file.php]

*Supplementary materials for the article:*

# **Blood-Nanoparticle Interactions Create a Brain Delivery Superhighway for Doxorubicin**

Zhuoxuan Li<sup>1</sup>, Tatyana Kovshova<sup>2</sup>, Julia Malinovskaya<sup>2</sup>, Julian Knoll<sup>1</sup>, Saeed Shانهsazzadeh<sup>1</sup>, Nadezhda Osipova<sup>2</sup>, Anastasia Chernysheva<sup>3</sup>, Pavel Melnikov<sup>2</sup>, Svetlana Gelperina<sup>2</sup>, Matthias G. Wacker<sup>1\*</sup>

- <sup>1</sup> National University of Singapore, Department of Pharmacy and Pharmaceutical Sciences, Faculty of Science, Singapore.
- <sup>2</sup> Dmitry Mendeleev University of Chemical Technology of Russia, Moscow, Russia.
- <sup>3</sup> V. Serbsky Federal Medical Research Centre of Psychiatry and Narcology of the Ministry of Health of the Russian Federation, Moscow, Russia.

\*Corresponding author: Matthias G. Wacker

[matthias.g.wacker@nus.edu.sg](mailto:matthias.g.wacker@nus.edu.sg)

## Supplementary materials

**Table S1.** Summary of the formulations used for modeling the distribution and elimination of free doxorubicin and nanodelivery systems.

| <b>Formulation</b>   | <b>Dose</b>                                  | <b>Study details</b>                                                                                                                         | <b>Ref.</b> |
|----------------------|----------------------------------------------|----------------------------------------------------------------------------------------------------------------------------------------------|-------------|
| Doxorubicin solution | Aqueous solution<br>(5 mg·kg <sup>-1</sup> ) | Healthy male Wistar rats<br>Bodyweight 180-200 g<br>Plasma pharmacokinetics ( <i>n</i> = 5-8)<br>Brain/plasma distribution ( <i>n</i> = 5-8) | [1]         |
| Doxorubicin solution | Aqueous solution<br>(6 mg·kg <sup>-1</sup> ) | Female Fisher rats<br>(methylcholantrene-induced histiocytoma)<br>Bodyweight 180–200 g<br>Plasma Pharmacokinetics ( <i>n</i> = 4)            | [2]         |
| PBCA nanoparticle    | 270 nm<br>(5 mg·kg <sup>-1</sup> )           | Healthy male Wistar rats<br>Bodyweight 180-200 g<br>Plasma pharmacokinetics ( <i>n</i> = 5-8)<br>Kidney/brain distribution ( <i>n</i> = 5-8) | [1]         |
| Doxil®               | 91.8 nm<br>(6 mg·kg <sup>-1</sup> )          | Female Fisher rats<br>(methylcholantrene-induced histiocytoma)<br>Bodyweight 180–200g ( <i>n</i> = 4)                                        | [2]         |

## Supplementary materials

**Table S2.** Parameter estimates used for the *in-silico* analysis of the nanodelivery systems with the biodistribution model

| Study design                                                            | Parameter                                | Range        | Ref.        |
|-------------------------------------------------------------------------|------------------------------------------|--------------|-------------|
| Doxil® (6 mg·kg <sup>-1</sup> ) in female Fisher rats                   | V <sub>DC</sub> (L)                      | 6.57-8.94    | [3]         |
|                                                                         | V <sub>DF</sub> (L)                      | 27.94-31.18  | [4]         |
|                                                                         | k <sub>T_in</sub> (h <sup>-1</sup> )     | 0.000001-0.1 | Estimation  |
|                                                                         | k <sub>T_out</sub> (h <sup>-1</sup> )    | 0.000001-0.1 | Estimation  |
|                                                                         | k <sub>Peri_in</sub> (h <sup>-1</sup> )  | 8.78-9.6     | [4]         |
|                                                                         | k <sub>Peri_out</sub> (h <sup>-1</sup> ) | 0.035-0.042  | [4]         |
|                                                                         | k <sub>B_in</sub> (h <sup>-1</sup> )     | 0.000001-0.1 | Estimation  |
|                                                                         | k <sub>B_out</sub> (h <sup>-1</sup> )    | 0.000001-0.1 | Estimation  |
|                                                                         | Body weight (g)                          | 180-200      | [4]         |
|                                                                         | Tumor weight (g)                         | 0.015*       | [4]         |
| f <sub>brain</sub> (%)                                                  | 1.239-1.323                              | NBRP Koyoto  |             |
| PBCA nanoparticles (5 mg·kg <sup>-1</sup> ) in healthy male Wistar rats | V <sub>DC</sub> (L)                      | 6.624-9.52   | [3]         |
|                                                                         | V <sub>DF</sub> (L)                      | 1.64-224.54  | [5]         |
|                                                                         | k <sub>Peri_in</sub> (h <sup>-1</sup> )  | 0.0206-1.4   | [5]         |
|                                                                         | k <sub>Peri_out</sub> (h <sup>-1</sup> ) | 0.0756-0.380 | [5]         |
|                                                                         | k <sub>B_in</sub> (h <sup>-1</sup> )     | 0.000001-0.1 | Estimation  |
|                                                                         | k <sub>B_out</sub> (h <sup>-1</sup> )    | 0.000001-0.1 | Estimation  |
|                                                                         | Body weight (g)                          | 180-200      | [5]         |
|                                                                         | f <sub>brain</sub> (%)                   | 0.963-1.245  | NBRP Koyoto |

The asterisk indicates that a fixed value was set.

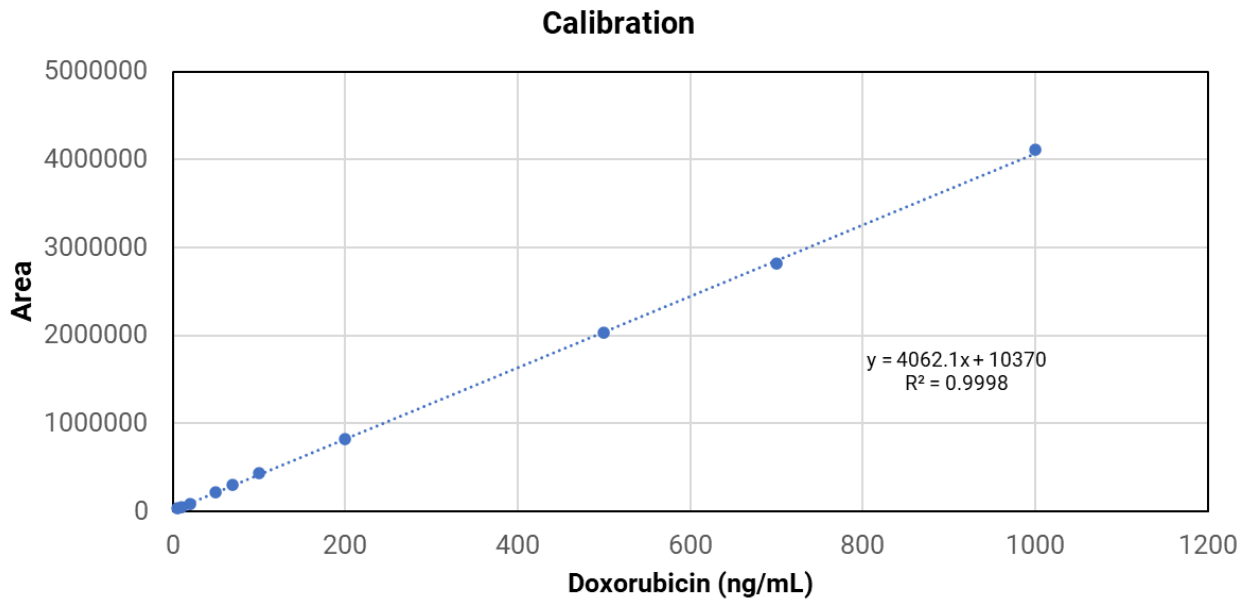

**Figure S1.** The calibration curve of doxorubicin measured by the HPLC method.

Supplementary materials

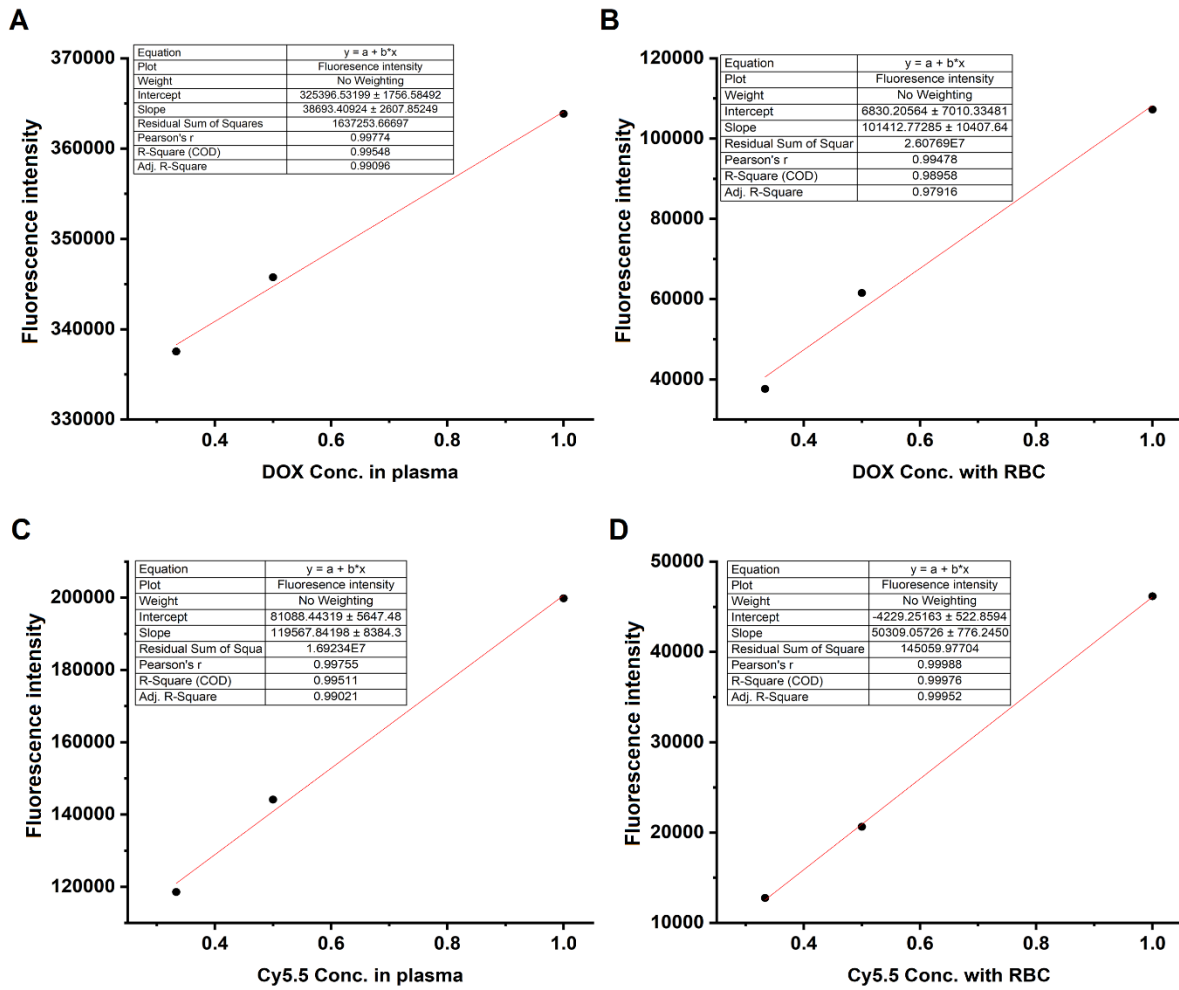

**Figure S2.** Calibration curves of fluorescence intensity of doxorubicin in the presence of plasma (A) and red blood cells (B), and Cy5.5 in the presence of plasma (C) and red blood cells (D).

## Supplementary materials

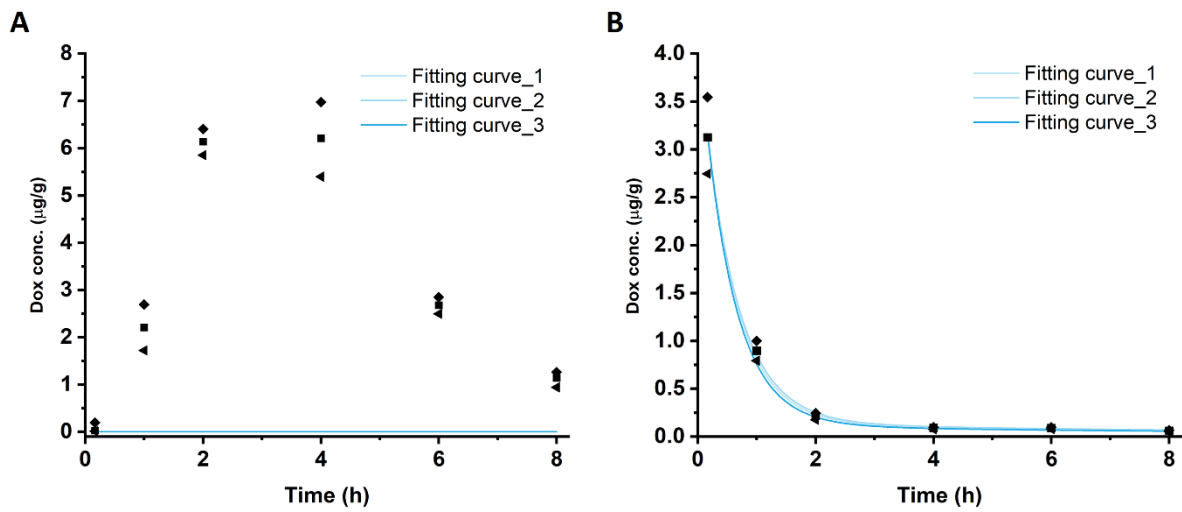

**Figure S3.** Simulated doxorubicin concentration-time profiles following intravenous administration of PBCA nanoparticles. Overlay between the predicted and the observed concentrations in (A) plasma and (B) brain for the pharmacokinetics observed by Gulyaev et al.. The observed upper ( $\blacklozenge$ ), mean ( $\blacksquare$ ) and lower ( $\blacktriangleleft$ ) values were fitted, respectively.

## Supplementary materials

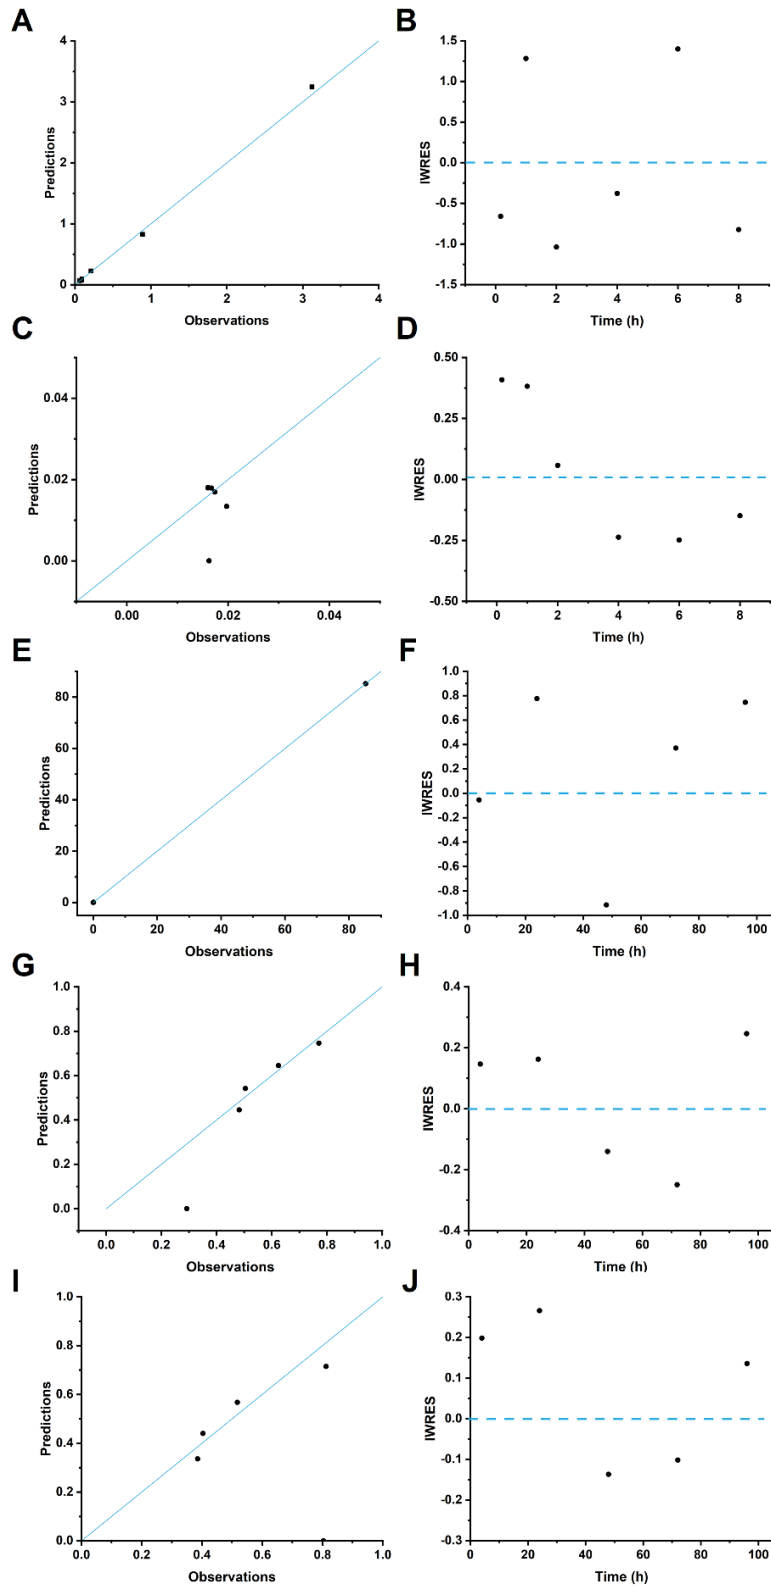

**Figure S4.** Diagnostic plots for compartmental models simulating doxorubicin concentrations following administration of free doxorubicin. Observed doxorubicin concentrations in (A) plasma and (C) brain obtained by Gulyaev et al., and (E) plasma, (G) brain, and (I) tumor obtained by Siegal et al. versus the individual predicted concentrations (with  $y = x$  line as the reference line). Individual weighted residual (IWRES) versus time for (B) plasma and (D) brain obtained by Gulyaev et al., and (F) plasma, (H) brain, and (J) tumor obtained by Siegal et al.

## Supplementary materials

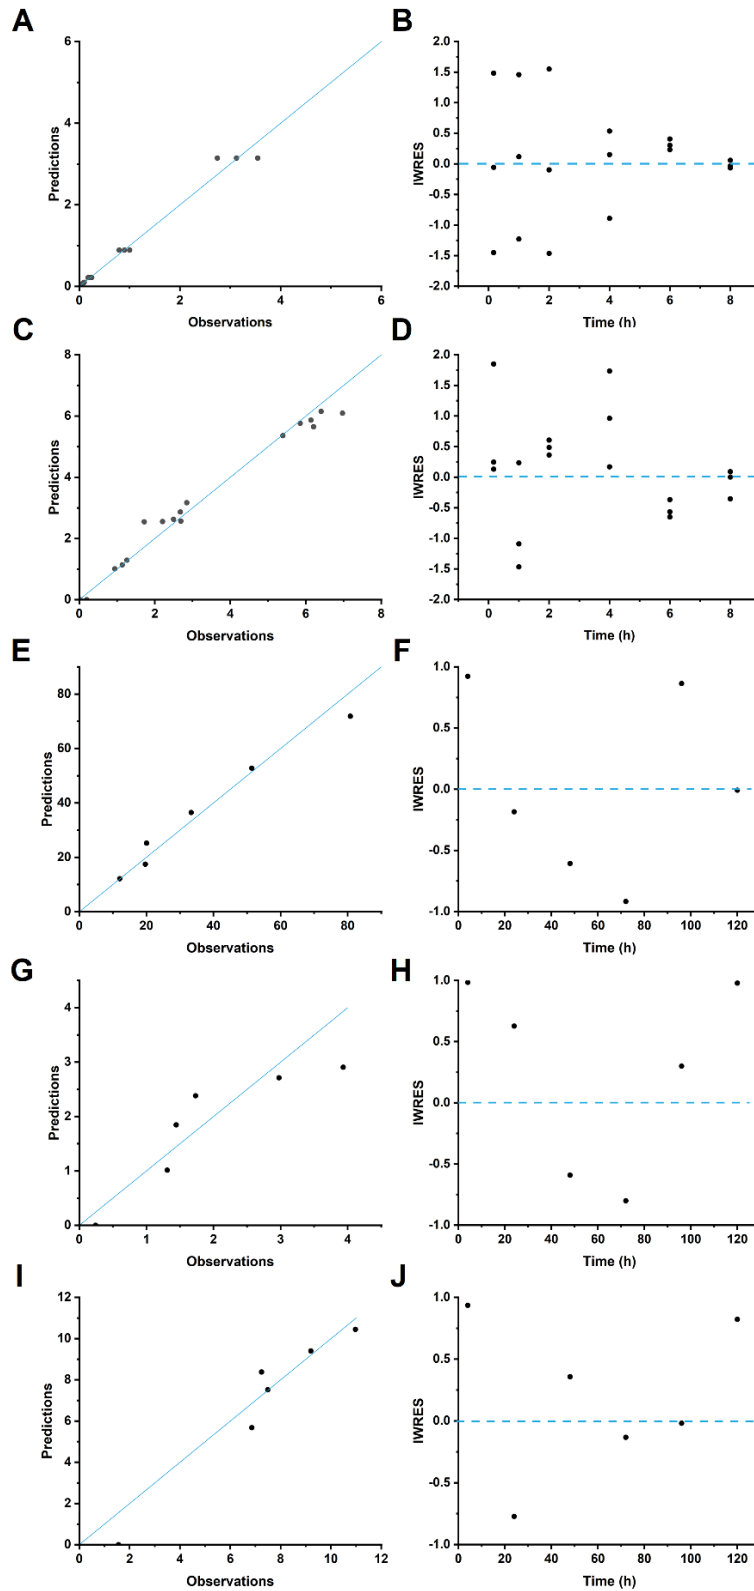

**Figure S5.** Diagnostic plots for the physiologically-based nanocarrier biopharmaceutics models simulating doxorubicin concentrations following administration of nanodelivery systems. Observed doxorubicin concentrations in (A) plasma and (C) brain obtained by Gulyaev et al., and (E) plasma, (G) brain, and (I) tumor obtained by Siegal et al. versus the individual predicted concentrations (with  $y = x$  line as the reference line). Individual weighted residual (IWRES) versus time for (B) plasma and (D) brain obtained by Gulyaev et al., and (F) plasma, (H) brain, and (J) tumor obtained by Siegal et al.



## Supplementary materials

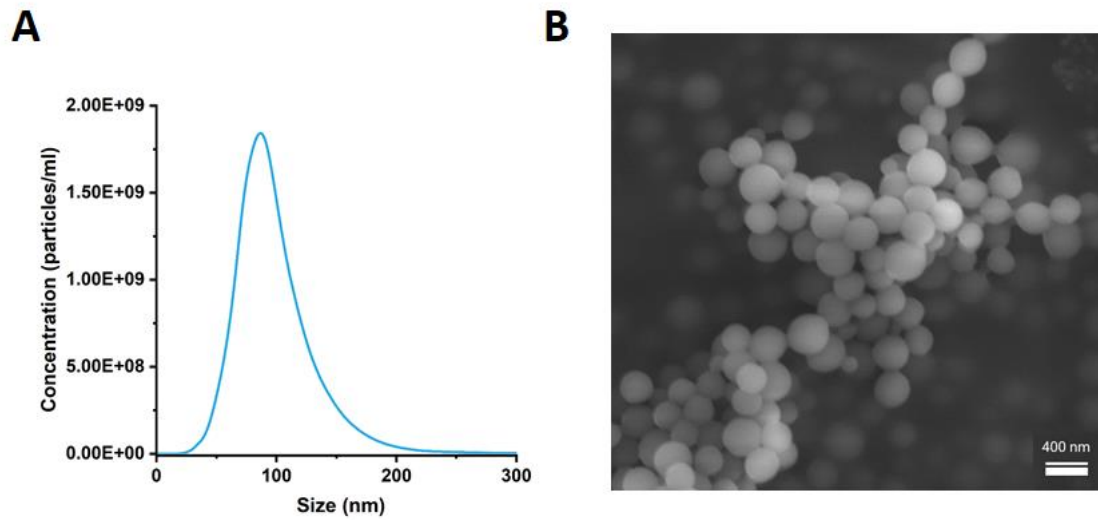

**Figure S6.** Characteristics of PBCA nanoparticles. (A) Concentration of PBCA nanoparticles in water at 37°C measured by nanoparticle tracking analysis. (B) Scanning electron micrograph of PBCA nanoparticles recorded with a TESCAN MIRA3 at 5 kV at 45,700-fold magnification.

## References

- [1] A.E. Gulyaev, S.E. Gelperina, I.N. Skidan, A.S. Antropov, G.Y. Kivman, J. Kreuter, Significant Transport of Doxorubicin into the Brain with Polysorbate 80-Coated Nanoparticles, *Pharm Res*, 16 (1999) 1564-1569.
- [2] T. Siegal, A. Horowitz, A. Gabizon, Doxorubicin encapsulated in sterically stabilized liposomes for the treatment of a brain tumor model: biodistribution and therapeutic efficacy, *J Neurosurg*, 83 (1995) 1029-1037.
- [3] H.B. Lee, M.D. Blafox, Blood volume in the rat, *J Nucl Med*, 26 (1985) 72-76.
- [4] T. Siegal, A. Horowitz, A. Gabizon, Doxorubicin encapsulated in sterically stabilized liposomes for the treatment of a brain tumor model: biodistribution and therapeutic efficacy, *J Neurosurg*, 83 (1995) 1029-1037.
- [5] A.E. Gulyaev, S.E. Gelperina, I.N. Skidan, A.S. Antropov, G.Y. Kivman, J. Kreuter, Significant transport of doxorubicin into the brain with polysorbate 80-coated nanoparticles, *Pharm Res*, 16 (1999) 1564-1569.
